# Supplementary material
Source: Springer Nature journal article supplement (https://www.springermedizin.de/resource/supplementary/12913_2012_2667_MOESM2_ESM.pdf/9531180)
Supplement: MOESM2 [file 9531180]

---

| Patterns                       | Mode of coordination:<br>Managerial-Professional                                  |
|--------------------------------|-----------------------------------------------------------------------------------|
| separated (3)                  |  |
| incompletely<br>integrated (2) |  |
| integrated (1)                 |  |

---
